# Supplementary material
Source: PubMed Central journal article supplement (PMC4400540)
Supplement: supp_eru297_jexbot126490_file001.pdf [file supp_eru297_jexbot126490_file001.pdf]

**Title:**

Overexpression of a novel *Arabidopsis* PP2C isoform, AtPP2CF1, enhances plant biomass production by increasing inflorescence stem growth

**List of the authors:**

Hiroki Sugimoto

Satoshi Kondo

Tomoko Tanaka

Chie Imamura

Nobuhiko Muramoto

Etsuko Hattori

Ken'ichi Ogawa

Norihiro Mitsukawa

Chikara Ohto

### **Supplementary Method S1. PCR templates for plasmid construction.**

*Arabidopsis* genomic DNA and cDNA, and RIKEN *Arabidopsis* full-length (RAFL) cDNA clones (Seki *et al.*, 1998, 2002) were used as templates for PCR to generate plasmid constructs as described below.

### **Supplementary Method S2. Construction of plasmids for the establishment of transgenic *Arabidopsis* plants.**

The two oligonucleotides (5'-AGCTTGGCGCGCCTTAATTAAGGCGCGCCA-3' and 5'-CTAGAGTCGACCTCGAGACTAGTTAATTAAGGCGCGCCA-3') were designed to anneal to each other, and inserted into the *HindIII/XbaI* sites of the *pBII21* vector (Clontech, Mountain View, CA, USA) to produce *pBII01N2*. To construct plasmids expressing  $\beta$ -glucuronidase (GUS) reporter gene under the control of the *AtPP2CF1* promoter (*pAtPP2CF1:GUS*), a DNA fragment containing the *AtPP2CF1* promoter was obtained by PCR using primers 5'-AGTCGACTGACTCAAAATCACGTTCTTGAA-3' and 5'-AGGATCCTTTGTCCAGAAAGTGAAAATATC-3'. This PCR fragment was inserted into the *pTOPO blunt* vector (Invitrogen, Carlsbad, CA) to produce *pAtPP2CF1pro*. The *Sall-BamHI* fragment of *pAtPP2CF1pro* was inserted into the *Sall-BamHI* sites of *pBII01N2*.

To construct plasmids expressing GUS reporter gene under the control of the *At3g16800* or *At5g27930* promoter (*pAt3g16800:GUS* and *pAt5g27930:GUS*, respectively), DNA fragments containing the *At3g16800* or *At5g27930* promoter were obtained by PCR. The following primers were used for PCR: *At3g16800* promoter, 5'-GCTATGACCATGATTACGCCAAGCTTAGACTGAATAATATAATGTCGG-3' and 5'-AAGGGACTGACCACCCGGGGATCCTCTTTGATTCTCTTATGATCCTAC-3'; *At5g27930* promoter, 5'-GCTATGACCATGATTACGCCAAGCTTAAACAAATCACGGGACGGGT-3' and 5'-AAGGGACTGACCACCCGGGGATCCCTTTTAAATACCCAAAAGATTAA-3'. These PCR fragments were inserted into the *HindIII/BamHI* sites of the *pBII21* vector using the In-Fusion Cloning System (Clontech, Mountain View, CA, USA), according to the manufacturer's instructions.

To construct plasmids expressing *AtPP2CF1* under the control of the 35S $\Omega$  promoter (*p35S $\Omega$ :AtPP2CF1*), a DNA fragment containing the *AtPP2CF1* genome was obtained by PCR using primers 5'-ACGCGTCGACATGGGACATTTCTCTTCCATGTTCAACGG-3' and 5'-TGTACATGTACTATAGAGATGGCGACGACGATGAAGAATGG-3'. This PCR fragment was inserted into the *pCR2.1* vector (Invitrogen, Carlsbad, CA) to produce *pAtPP2CF1*. The *HindIII-EcoRI* fragment of 35S $\Omega$ :*sGFP(S65T)* plasmid (Chiu *et al.*, 1996) was inserted into the *HindIII-EcoRI* sites of *pBII21* to produce *p35S $\Omega$ :sGFP*. The *Sall-BsrGI* fragment of *pAtPP2CF1* was inserted into the *Sall/BsrGI* sites of *p35S $\Omega$ :sGFP*.

To construct plasmids expressing *ABII* under the control of the 35S $\Omega$  promoter

(*p35S $\Omega$ :ABI1*), a DNA fragment containing the *ABI1* ORF was obtained by PCR using primers 5'-AATTACTATTTACAATTACAGTCGACATGGAGGAAGTATCTCCGGC-3' and 5'-AGCCGGGCGGCCGCTTTACTTGTACATCAGTTCAAGGGTTTGCTCT-3'. This PCR fragment was inserted into the *SalI/BsrGI* sites of the *p35S $\Omega$ :AtPP2CF1* using the In-Fusion Cloning System.

### **Supplementary Method S3. Construction of plasmids for yeast *ptc1* complementation test.**

For *pYC2/CT AtPP2CF1*, a DNA fragment containing the *AtPP2CF1* ORF was obtained by PCR using primers 5'-ACCCCGGATCGGACTACTAGCAGCTGTAATGGGACATTTCTCTTCCATGT-3' and 5'-CGGCCCTCTAGGATCAGCGGGTTTAAACCTATAGAGATGGCGACGACGATG-3'. This PCR fragment was inserted into the *PvuII/PmeI* sites of the *pYC2/CT* vector (Invitrogen, Carlsbad, CA) using the In-Fusion Cloning System.

For *pYC2/CT ABI1*, a DNA fragment containing the *ABI1* ORF was obtained by PCR using primers 5'-ACCCCGGATCGGACTACTAGCAGCTGTAATGGAGGAAGTATCTCCGGC-3' and 5'-CGGCCCTCTAGGATCAGCGGGTTTAAACTCAGTTCAAGGGTTTGCTCT-3'. This PCR fragment was inserted into the *PvuII/PmeI* sites of the *pYC2/CT* vector using the In-Fusion cloning system.

For *pYC2/CT PTCL1*, a DNA fragment containing the *PTCL1* ORF was obtained by PCR from *Saccharomyces cerevisiae* S288C genome using primers 5'-ACCCCGGATCGGACTACTAGCAGCTGTAATGAGTAATCATTCTGAAATCTT-3' and 5'-CGGCCCTCTAGGATCAGCGGGTTTAAACTTAGAGGAAGACAACCATGAC-3'. This PCR fragment was inserted into the *PvuII/PmeI* sites of the *pYC2/CT* vector using the In-Fusion cloning system.

### **Supplementary Method S4. Construction of plasmids for purification of AtPP2CF1 and ABI1.**

To construct plasmids for recombinant AtPP2CF1 with a glutathione *S*-transferase (GST) tag at the N-terminus (GST-AtPP2CF1), a DNA fragment containing the *AtPP2CF1* ORF was obtained by PCR using primers 5'-TCGGATCTGATCGAAGGTCGTGGGATCCTGATGGGACATTTCTCTTCCATGT-3' and 5'-AGTCAGTCACGATGCGGCCGCTCGAGCTATAGAGATGGCGACGACG-3'. This PCR fragment was inserted into the *BamHI/XhoI* sites of the *pGEX-5X-2* vector (Amersham Biosciences/GE Healthcare, Piscataway, NJ) using the In-Fusion Cloning System to produce *pGEX GST-AtPP2CF1*.

To construct plasmids for recombinant ABI1 with a GST tag at the N-terminus (GST-ABI1), a DNA fragment containing the *ABI1* ORF was obtained by PCR using primers

5'-TCGGATCTGATCGAAGGTCGTGGGATCCTGATGGAGGAAGTATCTCCGGC-3' and 5'-AGTCAGTCACGATGCGGCCGCTCGAGTCAGTTCAAGGGTTTGCTCT-3'. This PCR fragment was inserted into the *Bam*HI/*Xho*I sites of the *pGEX-5X-2* using the In-Fusion cloning system to produce *pGEX GST-ABII*.

### Supplementary Method S5. Yeast two-hybrid (Y2H) assays.

The control plasmids *pGBKT7* (bait plasmid) and *pGADT7 AD* (prey plasmid) for yeast two-hybrid assay were provided with the Matchmaker Gold Two-Hybrid System (Clontech, Mountain View, CA, USA). For *pGBKT7 PYRI*, *PYL1-13*, *AtPP2CF1*, or *ABII*, DNA fragments containing the *PYRI*, *PYL1-13*, *AtPP2CF1*, or *ABII* ORF were obtained by PCR. The following primers were used for PCR:

*PYRI*, 5'-tgatctcagaggaggacctgcatatgccttcggagttaacacc-3' and  
5'-gcaggtcgacggatccccgggaattctcacgtcacctgagaaccact-3'; *PYL1*,  
5'-tgatctcagaggaggacctgcatatggcgaattcagagtctc-3' and  
5'-gcaggtcgacggatccccgggaattcttacctaacctgagaagagttg-3'; *PYL2*,  
5'-tgatctcagaggaggacctgcatatgagctcatccccggccgt-3' and  
5'-gcaggtcgacggatccccgggaattcttattcatcatcatgcatagg-3'; *PYL3*,  
5'-tgatctcagaggaggacctgcatatgaatcttgcctcaatcca-3' and  
5'-gcaggtcgacggatccccgggaattctcaggtcggagaagccgtgg-3'; *PYL4*,  
5'-tgatctcagaggaggacctgcatatgcttgcctcaccgtcc-3' and  
5'-gcaggtcgacggatccccgggaattctcacagagacatcttcttct-3'; *PYL5*,  
5'-tgatctcagaggaggacctgcatatgaggtcaccggtgcaact-3' and  
5'-gcaggtcgacggatccccgggaattcttattgccggttggtacttcg-3'; *PYL6*,  
5'-tgatctcagaggaggacctgcatatgccaacgtcgatacagtt-3' and  
5'-gcaggtcgacggatccccgggaattcttacgagaatttagaagtggt-3'; *PYL7*,  
5'-tgatctcagaggaggacctgcatatggagatgatcggaggaga-3' and  
5'-gcaggtcgacggatccccgggaattctcaaggttggttctgtatg-3'; *PYL8*,  
5'-tgatctcagaggaggacctgcatatggaagctaaccgggattga-3' and  
5'-gcaggtcgacggatccccgggaattcttagactctcgattctgtcgt-3'; *PYL9*,  
5'-tgatctcagaggaggacctgcatatgatggacggcgttgaagg-3' and  
5'-gcaggtcgacggatccccgggaattctcactgagtaatgtcctgaga-3'; *PYL10*,  
5'-tgatctcagaggaggacctgcatatgaacggtgacgaaacaaa-3' and  
5'-gcaggtcgacggatccccgggaattctcatatcttcttccataga-3'; *PYL11*,  
5'-tgatctcagaggaggacctgcatatggaactctcaaaaata-3' and  
5'-gcaggtcgacggatccccgggaattcttacaactttagatgagccac-3'; *PYL12*,  
5'-tgatctcagaggaggacctgcatatgaaaacatctcaagaaca-3' and  
5'-gcaggtcgacggatccccgggaattcttaagtgcctccatctt-3'; *PYL13*,



5'-tgatctcagaggaggacctgcatatggaaagttctaagcaaaaa-3' and  
 5'-gcaggtcgacggatccccgggaattcttacttcatcattttctgt-3'; *AtPP2CF1*,  
 5'-tgatctcagaggaggacctgcatatgggacatttcttccatgt-3' and  
 5'-gcaggtcgacggatccccgggaattctatagagatggcgacgacg-3'; *ABII*,  
 5'-tgatctcagaggaggacctgcatatggaggaagtatctccggc-3' and  
 5'-gcaggtcgacggatccccgggaattctcagttcaagggttgctct-3'. These PCR fragments were inserted into the *NdeI/EcoRI* sites of the *pGBKT7* using the In-Fusion Cloning System.

For *pGADT7 AD SnRK2.2*, *SnRK2.3*, *SnRK2.6*, *AtPP2CF1*, or *ABII*, DNA fragments containing the *SnRK2.2*, *SnRK2.3*, *SnRK2.6*, *AtPP2CF1*, or *ABII* ORF were obtained by PCR. The following primers were used for PCR: *SnRK2.2*, 5'-acgacgtaccagattacgctcatatggatccggcgactaattc-3' and 5'-tatcgatgccaccgggtggaattctcagagacataaactatctc-3'; *SnRK2.3*, 5'-acgacgtaccagattacgctcatatggatcgagctccgggtgac-3' and 5'-tatcgatgccaccgggtggaattcttagagagcgtaaactatctc-3'; *SnRK2.6*, 5'-acgacgtaccagattacgctcatatggatcgaccagcagtgag-3' and 5'-tatcgatgccaccgggtggaattctcacattgctacacaatctc-3'; *AtPP2CF1*, 5'-acgacgtaccagattacgctcatatgggacatttcttccatgt-3' and 5'-tatcgatgccaccgggtggaattctatagagatggcgacgacgatg-3'; *ABII*, 5'-acgacgtaccagattacgctcatatggaggaagtatctccggc-3' and 5'-tatcgatgccaccgggtggaattctcagttcaagggttgctct-3'. These PCR fragments were inserted into the *NdeI/EcoRI* sites of the *pGADT7 AD* using the In-Fusion Cloning System.

The Y2H assay was performed using the Matchmaker Gold Two-Hybrid System (Clontech, Mountain View, CA, USA), according to the manufacturer's instructions. Yeast cells were grown and maintained in SD or YPD medium. SD medium lacking adenine, His, Leu, and Trp (SD-AHLW) but supplemented with 125 ng ml<sup>-1</sup> aureobasidin A and 40 ng ml<sup>-1</sup> X- $\alpha$ -gal (5-bromo-4-chloro-3-indolyl- $\alpha$ -D-galactopyranoside) was used as a high-stringency selective medium for the assay.

## Supplementary references

**Chiu W, Niwa Y, Zeng W, Hirano T, Kobayashi H, Sheen J.** 1996. Engineered GFP as a vital reporter in plants. *Curr Biol* **6**, 325-330.

**Falquet L, Pagni M, Bucher P, Hulo N, Sigrist CJ, Hofmann K, Bairoch A.** 2002. The PROSITE database, its status in 2002. *Nucleic Acids Res* **30**, 235-238.

**Gosti F, Beaudoin N, Serizet C, Webb AA, Vartanian N, Giraudat J.** 1999. ABI1 protein phosphatase 2C is a negative regulator of abscisic acid signaling. *Plant Cell* **11**, 1897-1910.

**Lee TH, Tang H, Wang X, Paterson AH.** 2012. PGDD: a database of gene and genome duplication in plants. *Nucleic Acids Res* **41**, D1152-1158.

**Merlot S, Gosti F, Guerrier D, Vavasseur A, Giraudat J.** 2001. The ABI1 and ABI2 protein phosphatases 2C act in a negative feedback regulatory loop of the abscisic acid signalling pathway. *Plant J* **25**, 295-303.

**Page RD.** 1996. TreeView: an application to display phylogenetic trees on personal computers. *Comput Appl Biosci* **12**, 357-358.

**Pei J, Kim BH, Grishin NV.** 2008. PROMALS3D: a tool for multiple protein sequence and structure alignments. *Nucleic Acids Res* **36**, 2295-2300.

**Rodriguez PL, Benning G, Grill E.** 1998. ABI2, a second protein phosphatase 2C involved in abscisic acid signal transduction in Arabidopsis. *FEBS Lett* **421**, 185-190.

**Seki M, Carninci P, Nishiyama Y, Hayashizaki Y, Shinozaki K.** 1998. High-efficiency cloning of Arabidopsis full-length cDNA by biotinylated CAP trapper. *Plant J* **15**, 707-720.

**Seki M, Narusaka M, Kamiya A, Ishida J, Satou M, Sakurai T, Nakajima M, Enju A, Akiyama K, Oono Y, Muramatsu M, Hayashizaki Y, Kawai J, Carninci P, Itoh M, Ishii Y, Arakawa T, Shibata K, Shinagawa A, Shinozaki K.** 2002. Functional annotation of a full-length Arabidopsis cDNA collection. *Science* **296**, 141-145.

**Thompson JD, Gibson TJ, Plewniak F, Jeanmougin F, Higgins DG.** 1997. The CLUSTAL\_X windows interface: flexible strategies for multiple sequence alignment aided by quality analysis tools. *Nucleic Acids Res* **25**, 4876-4882.

**Xue T, Wang D, Zhang S, Ehlting J, Ni F, Jakab S, Zheng C, Zhong Y.** 2008. Genome-wide and expression analysis of protein phosphatase 2C in rice and Arabidopsis. *BMC Genomics* **9**, 550.

**Zdobnov EM, Apweiler R.** 2001. InterProScan--an integration platform for the signature-recognition methods in InterPro. *Bioinformatics* **17**, 847-848.

**Supplementary Table S1. Gene-specific primers used in RT-qPCR.**

|                     |                                                                 |
|---------------------|-----------------------------------------------------------------|
| <i>At1g03590</i>    | 5'- tcagggaaaaattgtcttctgc -3'                                  |
|                     | 5'- tcatacaagcacagattttgagg -3'                                 |
| <i>At1g16220</i>    | 5'- cttgaagacacttcagcaggag -3'                                  |
|                     | 5'- gttgaagcctctctcttctgt -3'                                   |
| <i>At1g79630</i>    | 5'- atgccgacaaaaacacttcata -3'                                  |
|                     | 5'- cagctaacaatgaccaatctctca -3'                                |
| <i>At5g01700</i>    | 5'- agttgcagctgagatgttggtt -3'                                  |
|                     | 5'- cacgttctctctcttgggtaa -3'                                   |
| <i>At3g02750</i>    | 5'- agatttgcctggaaagtga -3'                                     |
|                     | 5'- gacacagtacctgtcttgggt -3'                                   |
| <i>At5g36250</i>    | 5'- aggagctcaatgtctctatgc -3'                                   |
|                     | 5'- tacaatgagtcacacagagca -3'                                   |
| <i>At5g26010</i>    | 5'- ctgcatggaagaaaaggctta -3'                                   |
|                     | 5'- caacagctaagcttgaccata -3'                                   |
| <i>At4g32950</i>    | 5'- gtgatgaagtcagcaagtgagg -3'                                  |
|                     | 5'- tggctgtggattatgcttctg -3'                                   |
| <i>At3g16800</i>    | 5'- atcaatgtatttgggcgcat -3'                                    |
|                     | 5'- tatctctcattctcaactctcc -3'                                  |
| <i>At3g05640</i>    | 5'- actagtactttggaccgggca -3'                                   |
| ( <i>AtPP2CF1</i> ) | 5'- ttgtgataggactctggtttg -3'                                   |
|                     | 5'- gaacccgataaagagctacagcg -3' (for transgenic plant analysis) |
|                     | 5'- ctctgtctgaaactgtggccaa -3'                                  |
| <i>At5g27930</i>    | 5'- ggaagaaaaagagacaaggatact -3'                                |
|                     | 5'- catcgctgatctattacaacac -3'                                  |
| <i>At4g03415</i>    | 5'- atgcagaggatgagaaaacggt -3'                                  |
|                     | 5'- attctcaagatcagtcctcag -3'                                   |
| <i>At4g27960</i>    | 5'- tcacaattccaagtgctgc -3'                                     |
| ( <i>UBC9</i> )     | 5'- tcactctgggttgatccgt -3'                                     |
| <i>At4g26080</i>    | 5'- tgaatatgggtctctccaagaaa -3'                                 |
| ( <i>ABI1</i> )     | 5'- tacaagggccttttagaatgt -3'                                   |
|                     | 5'- atccggagtgacggctgtga -3' (for transgenic plant analysis)    |
|                     | 5'- tcatccgagcaacgatgca -3'                                     |

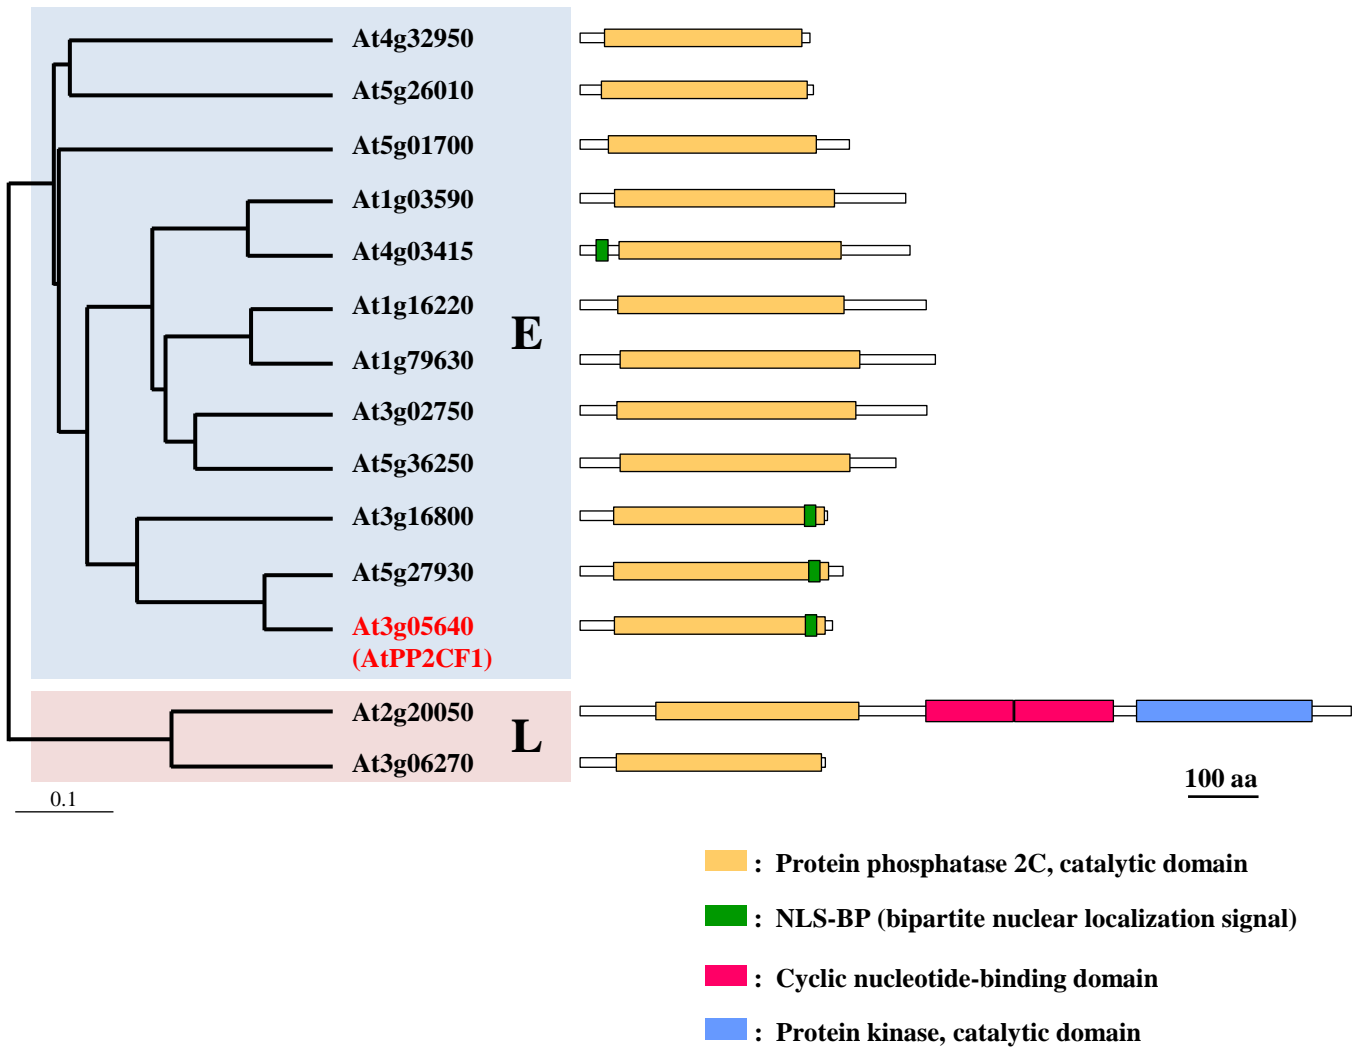

**Supplementary Figure S1.** Phylogenetic analysis of *Arabidopsis* PP2Cs belonging to subfamilies E and L. *Arabidopsis* subfamilies E and L PP2Cs constitute a sister clade, forming a monophyletic cluster (Xue *et al.*, 2008). For phylogenetic analysis, entire PP2C protein sequences from *Arabidopsis* subfamilies E and L were identified by The Arabidopsis Information Resource (TAIR) database (<http://www.arabidopsis.org/>) and were aligned with the PROMALS3D program (Pei *et al.*, 2008) using two PDB IDs, chain B of 3KDJ and chain A of 3JRQ, as reference 3D structures and secondary structures. The tree was generated using TreeView (Page, 1996). Functional domains were predicted using InterProScan (Zdobnov and Apweiler, 2001) and PROSITE (Falquet *et al.*, 2002).

# Supplementary Figure S2

| Accession | Residue                                                                  | Sequence                                                                         | Accession | Residue | Sequence |
|-----------|--------------------------------------------------------------------------|----------------------------------------------------------------------------------|-----------|---------|----------|
| A         | At4g26080-ABII                                                           | 140 EM---EDAVSTIPRFLQSSSGSML----DGRFDPQSAAHFFGVYDGHG--GSQVANYCRERMHLALAEIEAKEK   | 204       |         |          |
|           | At5g57050                                                                | 124 EM---EDSVSTIPRFLQVSSSSLLDG-RVTNGFNPHLSAHFFGVYDGHG--GSQVANYCRERMHLALTEIEIVKEK | 192       |         |          |
|           | At1g72770                                                                | 201 EM---EDAFAVSPHFLKLPKIKMLMGDHEGMSPSLTLTGHFFGVYDGHG--GHKVADYCDRLHFLAFALAEIERIK | 270       |         |          |
|           | At1g17550                                                                | 200 EM---EDAVRALPHFLKLPKIKMLMGDHEGMSPSLTYLTSHFFGVYDGHG--GAQVADYCHDRIHSAALAEIERIK | 269       |         |          |
|           | At3g11410                                                                | 116 DM---EDAVSILHPSFLQRNS-----ENNHFFGVYDGHG--CSHVAACKRERLHDIIVKKEVEMA            | 169       |         |          |
| B         | At2g29380                                                                | 89 EM---EDAVAIHPSFSSPKN-----SEF-PQHFFGVYDGHG--CSHVAACRERLHKLQVEELSSDM            | 144       |         |          |
|           | At5g59220                                                                | 123 EM---EDAVAVHPFFSRHQT-----EYSSTGFHYCGVYDGHG--CSHVAMKCRERLHELVRBEFEADA         | 180       |         |          |
|           | At1g07430                                                                | 132 DM---EDAVALHPSFVRKQT-----EFSRTRWHYFGVYDGHG--CSHVAACRERLHELVEEALS DK          | 189       |         |          |
|           | At5g51760                                                                | 120 KM---EDSVTVKPNLCKPEV-----NRQRPVHFFAVYDGHG--GSQVSTLCSSTMHTFVKELEQNL           | 176       |         |          |
|           | At4g08260                                                                | 1 ---MDFRFSAITNLHG-----DHKQAI FGVYVGHG--GVKAAEFAAKNLDKNI VEEVVDAT                | 51        |         |          |
| C         | At3g27140                                                                | 1 ---MDFRFSITNLHG-----DRKQAI FGVYVGHG--GVKAAECPAKNLDKNI VEEVVGKR                 | 51        |         |          |
|           | At2g30020                                                                | 151 AM---EDRFSAITNLHG-----DRKQAI FGVYDGHG--GVKAAEFAAKNLDKNI VEEVVGKR             | 202       |         |          |
|           | At1g07160                                                                | 134 AM---EDRFSAITNLQG-----DPKQAI FGVYDGHG--GPTAAEFAAKNLC SNILGEIVGGR             | 185       |         |          |
|           | At3g40180                                                                | 140 PM---EDRYFAAVDRNDD-----GYKNAFFGVYDGHG--GSKAAEFAAMNLGNIEAAMASAR               | 193       |         |          |
|           | At1g67820                                                                | 132 FM---EDTHRIVPCLVG-----NSKKSFFGVYDGHG--GAKAAEFVAENLHKYV VEMMENCK              | 183       |         |          |
| D         | At5g02400                                                                | 260 AG---EDRVHVVVVSE-----DNGVWFVFGIYDGF S--GPDAPDYLLNLYTAVQKELNGLL               | 309       |         |          |
|           | At3g09400                                                                | 254 AG---EDRVHVLISE-----ENGLWFGVIYDGF S--GPDPPDYLLKNLYTAVLRELKGLL                | 303       |         |          |
|           | At1g07630                                                                | 264 AG---EDRVHVVVVSE-----EHGWLFGVIYDGF N--GPDAPDYLLSHLYPVVHRELKGLL               | 313       |         |          |
|           | At2g28890                                                                | 258 AG---EDRVHVVVVSE-----EHGWLFGVIYDGF N--GPDAPDYLLSHLYPAVHRELKGLL               | 307       |         |          |
|           | At2g35350                                                                | 273 AG---EDRVQLAVFE-----KQGWLFGVIYDGF N--GPDAPDFVMSHLYKADKELEGLL                 | 322       |         |          |
| E         | At2g46920                                                                | 285 AG---EDRVHVVLSE-----EQGWLFGVIYDGF S--GPDAPDFVMSHLYKADKELEGLL                 | 334       |         |          |
|           | At3g16560                                                                | 158 AG---EDRVQAVCSE-----ENGLWFCAYDGF N--GPDAPDFVMSHLYKADKELEGLL                  | 207       |         |          |
|           | At3g51370                                                                | 56 LL---EDQSQVESGPLSTLD-----SGPYGTFGTIGYDGHG--GPETSRFVNDHLFQHLKRF AAEQA          | 111       |         |          |
|           | At5g66080                                                                | 58 LL---EDQSQVESGPLTTL S-----SSGPGTFGTIGYDGHG--GPETSRFVNDHLFHLKRF AAEQD          | 114       |         |          |
|           | At4g38520                                                                | 58 LL---EDQSQLESGLSSHD-----SGPFGTFGTIGYDGHG--GPETSRFINDHMFHLKRF TAEQQ            | 113       |         |          |
| F1        | At3g12620                                                                | 60 LL---EDHSKLESGLPVMFD-----SGPQAT FGVYDGHG--GPEAARFVNKHLFDNIRKFTSENH            | 115       |         |          |
|           | At3g55050                                                                | 61 LL---EDHSQLESGLPISLHE-----SGPEAT FGVYDGHG--GPEAARFVNDRLFYNIKRYTSEQR           | 116       |         |          |
|           | At5g02760                                                                | 49 VM---EDQCQIESGPLTFENN-----PTVQGT FGVYDGHG--GPEASRFVNDHLFHLKRF AAEQD           | 104       |         |          |
|           | At3g17090                                                                | 69 VL---EDQSQVESGNF-----GTFVGYDGHG--GPEAARYVCDFLNFHFR EISAETQ                    | 116       |         |          |
|           | At4g33920                                                                | 46 RL---EDQSQVFTSS-----SATYVGYDGHG--GPEASRFVNRHLFPYMHKFAREHG                     | 93        |         |          |
| F2        | At5g06750                                                                | 67 VI---EDHSQVETGN-----GAVFVGYDGHG--GPEASRYISDHLFSLMRVSRERS                      | 114       |         |          |
|           | At4g32950                                                                | 54 LN---QDAAILHLGYGT-----EFGALFCVFDGHGPRGAFVSKNVRNQLPSILLGHNHNS                  | 106       |         |          |
|           | At5g26010                                                                | 55 LN---QDHAVLYQGYGT-----RDTELCGVFDGHGKNGHMVSKMVRNRLPSVLLALKEELN                 | 107       |         |          |
|           | At5g01700                                                                | 59 IN---QDAMTVWENFGG-----EEDTIFCGVFDGHGPMGHKISRHVCE NLP SRVH SKIRSSK             | 112       |         |          |
|           | At1g03590                                                                | 72 IN---QDAMIWVEDFMS-----KDVTFCGVFDGHGPHLVARKVRD SLPVKLLSLLNSIK                  | 124       |         |          |
| G         | At4g03415                                                                | 79 IN---QDAMIWVEDFMS-----EDVTFCGVFDGHGPHYGLVARKVRD TLPVKLQFFQFTLQ                | 131       |         |          |
|           | At1g16220                                                                | 76 TN---QDAMLWENFCS-----RSDTVLCGVFDGHGPFGHMVSKVRDMLPFTLSTQLKMTS                  | 129       |         |          |
|           | At1g79630                                                                | 79 TN---QDAMLVFNFC S-----RDDTVFCGVFDGHGPFGHMVAKKVRD TLPFTLLTQLKMTS               | 132       |         |          |
|           | At3g02750                                                                | 76 PN---QDAMVWENFGS-----RDTDTFCGVFDGHGPHYGHMVARKVRD NLP LKLSAYWEAKV              | 129       |         |          |
|           | At5g36250                                                                | 79 PN---QDAMIWVENFGS-----MEDTVFCGVFDGHGPHYGHMVARKVRD LPLKLGSHLESYV               | 132       |         |          |
| H         | At3g16800                                                                | 74 IN---QDRALVWEGFGC-----QEDTIFCGMFDGHGPHVLA KRVRD LPSVLLCQWQOTL                 | 127       |         |          |
|           | At5g27930                                                                | 73 VN---QDCALVWEGFGC-----QEDMI FCGIFDGHGPHGHYVAKQVRN SMP LSLCNWQETL              | 126       |         |          |
|           | At3g05640-AtPP2CF174                                                     | 74 VN---QDCALVWEGYGC-----QEDMI FCGIFDGHGPHGHVSKQVRN SMP LSLCNWQETL               | 127       |         |          |
|           | At4g28400                                                                | 48 PM---EDYVSEFFKLE-----GHELGLFAIFDGH L--GHDVAKYLQTNLFDN I LKEKDFWT              | 99        |         |          |
|           | At2g20630                                                                | 44 PM---EDYVSEFFKVD-----GHDGLFAIFDGH L--GHDVAKYLQTNLFDN I LKEKDFW                | 95        |         |          |
| I         | At3g15260                                                                | 54 EM---EDYVVAKFKEVD-----DNELGLFAIFDGH L--SHEIPDYLCSHLFENILKEPNEFWQ              | 105       |         |          |
|           | At1g78200                                                                | 45 SM---EDYHVAKFTNFN-----GNELGLFAIFDGH K--GDHVAAYLQKHLF SNILKDGFEV               | 96        |         |          |
|           | At1g34750                                                                | 47 PM---EDYHVSKFVKID-----GNELGLFAIFDGH L--GERVFPAYLQKHLF SNILKEEQFRY             | 98        |         |          |
|           | At1g22280                                                                | 46 PM---EDYHVNANFINIQ-----DHELGLFAIFDGH M--GDSVPAYLQKRLF SNILKEGEFW              | 97        |         |          |
|           | At2g34740                                                                | 100 GM---EDFIVADTKTVK-----GHNGLGLYALFDGH S--GSDVADYLNKHLF SNILSQDPDFW            | 151       |         |          |
| J         | At5g24940                                                                | 45 SM---EDDFETRIDGID-----GEIVGLFGVFDGHG--GSRAAEYVKRHLF SNILTHPKFIS               | 96        |         |          |
|           | At5g10740                                                                | 45 SM---EDDFETRIDGID-----GEIVGLFGVFDGHG--GARAAEYVKRHLF SNILTHPKFIS               | 96        |         |          |
|           | At4g31750                                                                | 45 SM---EDDFETRIDGVE-----GEIVGLFGVFDGHG--GARAAEYVKRHLF SNILRHPKFIS               | 96        |         |          |
|           | At5g53140                                                                | 113 TM---EDFYDIKASTIE-----GQAVCFMFGIFDGHG--GSRAAEYKLEHLFNNL MKHPQLT              | 164       |         |          |
|           | At1g43900                                                                | 135 TM---EDFYFETRISDVN-----GQMVAFVGFVDGHG--GARTAEYLKNNL FKNLVS HDDFIS            | 186       |         |          |
| K         | At1g48040                                                                | 90 TM---EDEHICIDDL SAHLGS-----YNFVSPSAFYGVFDGHG--GPEAAIFMKNELTR LFFQDAVFP        | 148       |         |          |
|           | At3g17250                                                                | 130 YM---EDEHICIDDLSDHLGSS-----FYRFPVPMAFYGVFDGHG--GSDASQYIKENAMSLFF EDAVERQ     | 190       |         |          |
|           | At3g62260                                                                | 90 NM---EDEHIRLIDDLSSQVGS-----LFELPKPSAFYAVFDGHG--GPEAAAYVRENAIRFFF EDEQFPQ      | 148       |         |          |
|           | At2g25620                                                                | 101 SM---EDAYLCVDNFMD SFGL-----LNSEAGPSAFYGVFDGHG--GKHAAEFACHH IPRYI VEDQEPS     | 160       |         |          |
|           | At2g33700                                                                | 96 FM---EDEHICIDDLVNLG A-----AIQCSLGAFYGVFDGHG--GTDAAHFVKNLIRFV EDDSSFFL         | 155       |         |          |
| L         | At3g51470                                                                | 84 SM---EDDFICVDDLTEYIG-----SSTGAFYGVFDGHG--GVDAAASFTKKNIMKLVME DKHFPT           | 138       |         |          |
|           | At1g09160                                                                | 44 KG---EDYFLIKTDCERVPG-----DPSAFAFSVFGIFDGH N--GNSAAIYTKEHLL ENNVSAIPQGA        | 100       |         |          |
|           | At1g68410                                                                | 49 KG---EDYVLIKTDSL RVPS-----NSSTAFS VFAVFDGH N--GKAAAVYTR ENLLN HVI SALPSGL     | 105       |         |          |
|           | At1g47380                                                                | 40 KG---EDFTLVKTECQRVMG-----DGVTTFVSFGLFDGH N--GSAAA IYTKENLLN NVAI PSDL         | 96        |         |          |
|           | At2g25070                                                                | 35 TM---EDAHAAI LDDL-----DKTSFFGVYDGHG--GKVVAKFC AKYLHQQV I SNEAYKT              | 84        |         |          |
| M         | At4g31860                                                                | 35 SM---EDAHAAI LDDL-----DNTSFLGVYDGHG--GKVVSKFC AKYLHQQVLS DEAYAA               | 84        |         |          |
|           | At3g63320                                                                | 37 KGG-GNTRRIVF SVPLIFAFPPP-----TGTPKDVLVGIAAVFDGH S--GSEASEMASQLL LDYFALHIYFL   | 101       |         |          |
|           | At3g63340                                                                | 83 YQ---EDRLLCALDRIPFP GK-----TGTPKDVLVGIAAVFDGH N--GAEASDMASK LLLDYFALHINFL     | 144       |         |          |
|           | At5g66720                                                                | 186 GG---EDAHFICDE-----EQAIGVADGVG--GWA E VGVNAGLFSRELMSYSVSAI                   | 231       |         |          |
|           | At4g16580                                                                | 234 GG---EDAHFICAE-----EQALGVADGVG--GWAELGIDAGYYSRELMSNSVNAI                     | 279       |         |          |
| N         | At2g30170                                                                | 63 GG---EDAFFVSSY-----RGGVMAVADGV S--GWA EQD VDPDFSKELMANASRLV                   | 109       |         |          |
|           | At3g06270                                                                | 65 SPDKENQDTYCIKTELQ G-----NPNVHFFGVYDGHGVLGTQCSNFV KERVVEMLS EDPDTLE            | 122       |         |          |
|           | At2g20050                                                                | 120 ALDKANQDSFAIHTPFGS-----NSDDHFFGVYDGHGGEFQAQCSQFVKRVCENLRHGRFRFV              | 177       |         |          |
|           | At4g33500                                                                | 496 AG---REDAYFISH-----HNWIGIADGV S--QWSFEGINKGMYAQELMSNCKEII                    | 541       |         |          |
|           | At4g11040                                                                | 90 AM---TTAVS TVVDEI-----PSYDIFPGIFDGLR-----LAKFDFDR LRLVKEEVKACH                | 136       |         |          |
| At5g19280 | 322 PM---EDVCHYKWLPLG-----ANKGFLFCV DGHG--GSGAAQSAIKI IPEVLANILSDSL      | 373                                                                              |           |         |          |
| At2g40860 | 404 SM---EDTHFII PHMCN-----EESIHFAIFDGH R--GAAA AEFSAQVLPGLVSLCSTSA      | 455                                                                              |           |         |          |
| At4g27800 | 71 EM---EDDIVRSDAV-----DSFSVAAVFDGH A--GSSSVKFLREEL YKECVGALQGS          | 120                                                                              |           |         |          |
| At1g18030 | 86 TM---EDVVVVL PDASLDF-----PGTLRCAHFAIYDGHG--GRLAAEF AKKHLHLNVL SAGLPRE | 141                                                                              |           |         |          |
| At3g23360 | 55 ND---DSV FVQREQQSD-----ELEIWLFGVSNAGT--GKEI VKYMQNHLFDKLP NELGIMR     | 106                                                                              |           |         |          |

Consensus sequence \*\*\*\*\*pD\*h\*\*\*\*\*hhtlrdGRs//G\*sphh\*p\*l\*p\*l\*p\*\*\*\*\*

**Supplementary Figure S2.** Sequence alignment of conserved consensus motif 4 in all *Arabidopsis* PP2Cs. The secondary structure of ABI1 was superimposed on top of the protein sequence alignment. Green arrowheads and gray circles indicate active-site residues and PYR/PYL/RCAR-binding residues of ABI1, respectively. The red arrowhead indicates the Gly residue converted to Asp in *Arabidopsis abi1-1* and *abi2-1* mutants (Gosti *et al.*, 1999; Merlot *et al.*, 2001; Rodriguez *et al.*, 1998). Entire protein sequences of all *Arabidopsis* PP2Cs were identified by The Arabidopsis Information Resource (TAIR) database (<http://www.arabidopsis.org/>) and were aligned in PROMALS3D (Pei *et al.*, 2008) using two PDB IDs, chain B of 3KDJ and chain A of 3JRQ, as reference 3D structures and secondary structures. Consensus amino acids are represented as given below. Consensus symbols: conserved amino acids are in bold and uppercase letters; aliphatic (I, V, L): *l*; aromatic (Y, H, W, F): *r*; hydrophobic (W, F, Y, M, L, I, V, A, C, T, H): *h*; polar (D, E, H, K, N, Q, R, S, T): *p*; tiny (A, G, C, S): *t*; small (A, G, C, S, V, N, D, T, P): *s*.

# Supplementary Figure S3

*At4g32950*

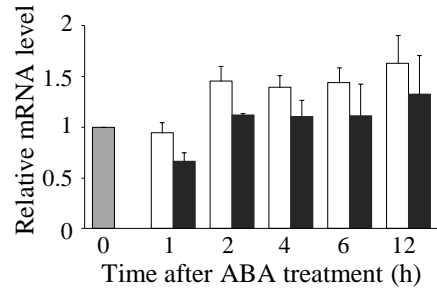

*At5g26010*

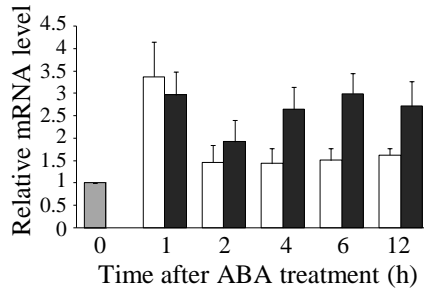

*At5g01700*

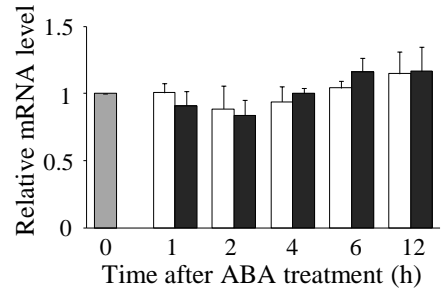

*At1g03590*

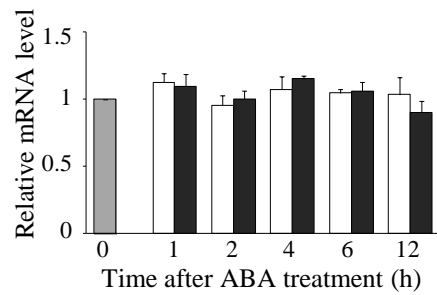

*At4g03415*

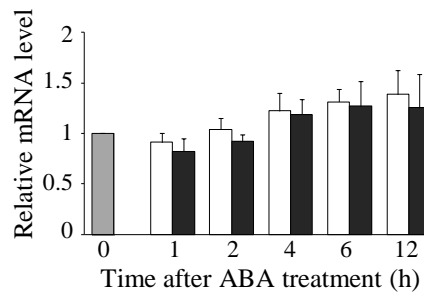

*At1g16220*

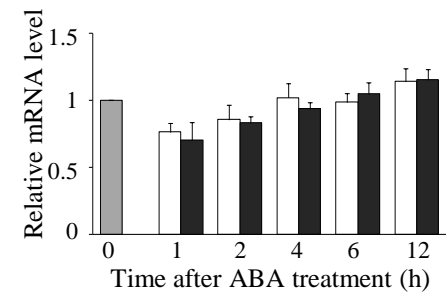

*At1g79630*

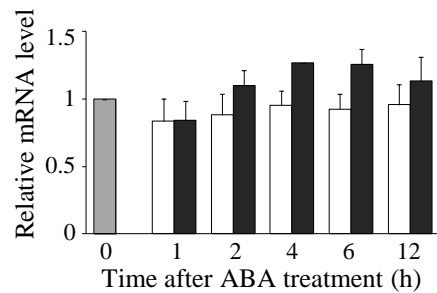

*At3g02750*

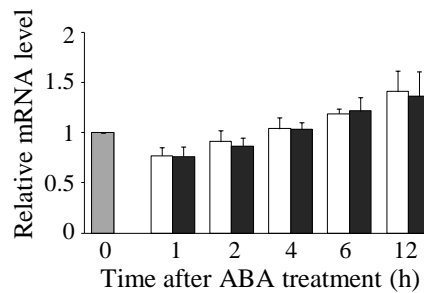

*At5g36250*

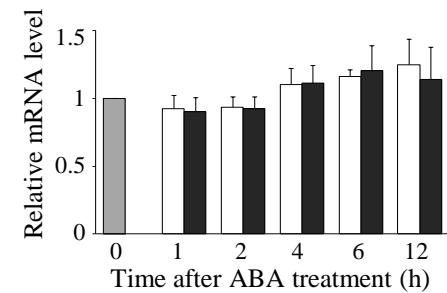

*At3g16800*

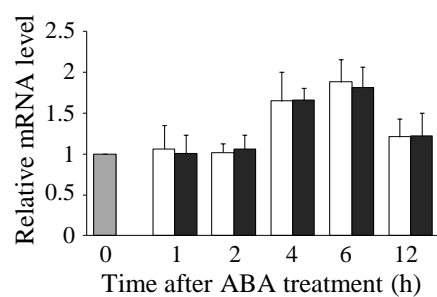

*At5g27930*

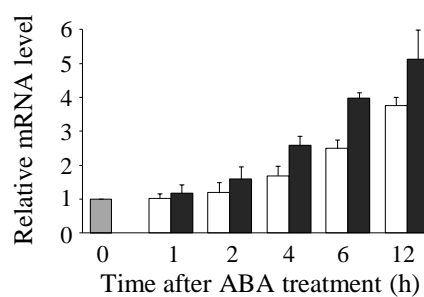

*At3g05640-AtPP2CF1*

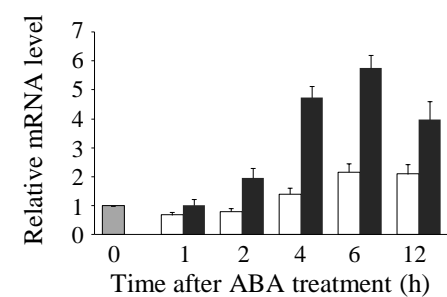

*At4g26080-ABI1*

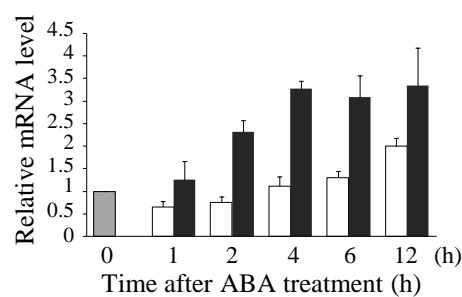



**Supplementary Figure S3.** Time course of subfamily E PP2C mRNA expression in aerial parts of wild-type *Arabidopsis* plants treated with ABA. Wild-type *Arabidopsis* plants were germinated aseptically on MS medium with gellan gum. Two-week-old seedlings were sprayed with 10  $\mu$ M ABA or 0.1% DMSO (mock control). Total RNA from aerial parts was isolated at the indicated time points after ABA or mock treatment and subjected to RT-qPCR. The expression ratios of individual subfamily E PP2C genes to *UBC9* were calculated for each time point and for each treatment (ABA, black bars; mock control, white bars). The expression ratios before ABA treatment (0 h) were arbitrarily set to 1.0 and are shown as gray bars. Values represent the mean  $\pm$  S.D. of three independent experiments.

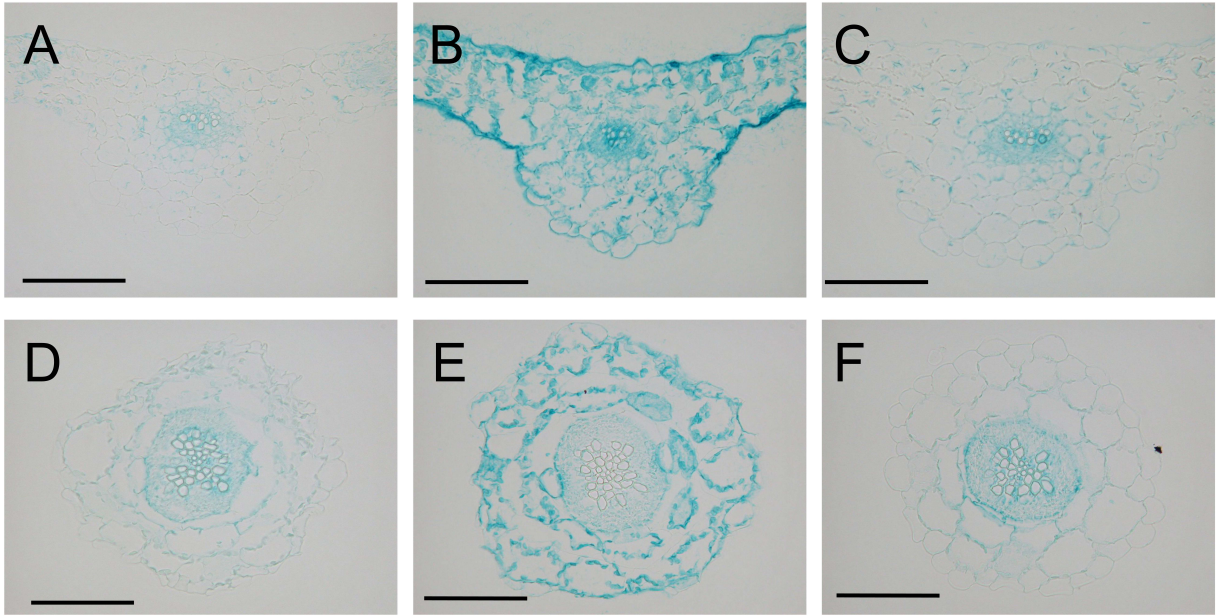

**Supplementary Figure S4.** Histochemical analysis of GUS activity in transgenic *Arabidopsis* plants *pAtPP2CF1:GUS*, *pAt3g16800:GUS*, and *pAt5g27930:GUS*. GUS-stained tissues were sectioned into 12- $\mu$ m-thick slices after paraffin embedding (GenoStaff, Inc., Tokyo, Japan). (A–C) Transverse sections of the basal parts of rosette leaves of *pAtPP2CF1:GUS* (A), *pAt5g27930:GUS* (B), and *pAt3g16800:GUS* (C) transgenic plants. (D–F) Transverse sections of hypocotyls of *pAtPP2CF1:GUS* (D), *pAt5g27930:GUS* (E), and *pAt3g16800:GUS* (F) transgenic plants. All scale bars: 100  $\mu$ m.

```

PTC1      10 --RPE■TPY■DI■TYR■VGVAEN■KNSKFRRT■ME■DVHTYV■KNFASR■LDWG■-----YFAVFD
ABI1     118 RSLF■E■FKSVPL■YGFT■SI■CGRR■PE■MEDAVSTI■PRFL■QSSSGS■MLDGRFDPQSAAH■FFGVYD
AtPP2CF1  49 RSSGCINAD■GS■NNLASVFSRR■GE■KG-VN■QDCAIVWEGY■G■CQEDMI■-----FCGIFD

PTC1      59 GHA--GI■QASK■WC■GKHLHTI■TEQNI■LADETRDVR-----DVLNDSFLAIDE
ABI1     178 GHG--GS■OVAN■YCRERMHL■LALAE■EI■AKE■KPMLCDGDT-----WLEK■W■KKAL■FNSFL■RVDS
AtPP2CF1  99 GHG■PW■GHFV■SK■QVRNSM■PIS■LLCN■WKETLS■QTTIAE■PKELQRF■AI■WKYSFL■KT■CEAVDL

PTC1     103 EINT■TKLVGNSGCTAAVCVLRWEL■PD■SVS■DD■SMDLAQHQR■KLY■TANVGDSRI■VL■FRNGN--
ABI1     231 EIES-----VAP■ETVG■STSVVAVV■FPSH■IFVANC■GDSRAVLC■RGKT--
AtPP2CF1  159 ELE■HR-----K■IDSFNS■GTTALT■IVRQGDVI■YIANVGDSRAV■LATVSDEG

PTC1     161 ---SIR■LT■YDHK■ASDTLEM■Q■RV■E■QAG-----GLIMKS---RVNGMLAV■TRSLGDK
ABI1     272 ---AL■PLS■V■DHK■PDREDEA■ARIEA■AG-----GK■VI■Q■WNGARV■FGVLAMSR■SIGDR
AtPP2CF1  205 SLVAV■QLTV■DFK■PNLPQ■E■E■RI■IG■CNGRVFCLQDEP■GV■HRV■W■QPVDES■PGLAMSR■AFGDY

PTC1     205 FFDSL-V■VGSP■F■TT■SVE■ITS■EDK■FLILACDGLWDVID■DDQ■DACELIKD-----
ABI1     319 YLKPS-I■IPD■PEV■TAV■KRVK■EDDCLILASDGVWDVMT■DEE■EACEMARKRILLWHKKN■AVAG
AtPP2CF1  265 CIKDYGLVSV■PEVT■QRHISIR■DQ■FI■LATDGVWDVVIS■NQEA■IDIVSS-----

PTC1     251 -----ITE■PNEAAK■VLVRYALENG-----TTDNVTVMVV
ABI1     378 DASLLADERRKEGKDPAA■MSAAEYL■SKLAI■Q■RG-----SKDNISVVVV
AtPP2CF1  312 -----TAERAKAAK■RLV■QQA■VR■AWNRKRRGIAMDDISAV■CL

```

**Supplementary Figure S5.** Multiple sequence alignments of the predicted phosphatase catalytic domain in AtPP2CF1 with those in PTC1 and ABI1. Amino acid sequence alignment was performed using ClustalX (Thompson *et al.*, 1997). Alignments include the phosphatase domains of AtPP2CF1 (residues 49–347) in *Arabidopsis thaliana* (accession No. BAH19512), ABI1 (residues 118–420) in *A. thaliana* (accession No. CAA54383), and PTC1 (residues 10–279) in *Saccharomyces cerevisiae* (accession No. CAA98562). The residues in black boxes are identical in at least two of the three polypeptides, and those in shaded boxes share similarity with conserved residues. Numbers in the left column indicate residue numbers in the polypeptides.

**A**

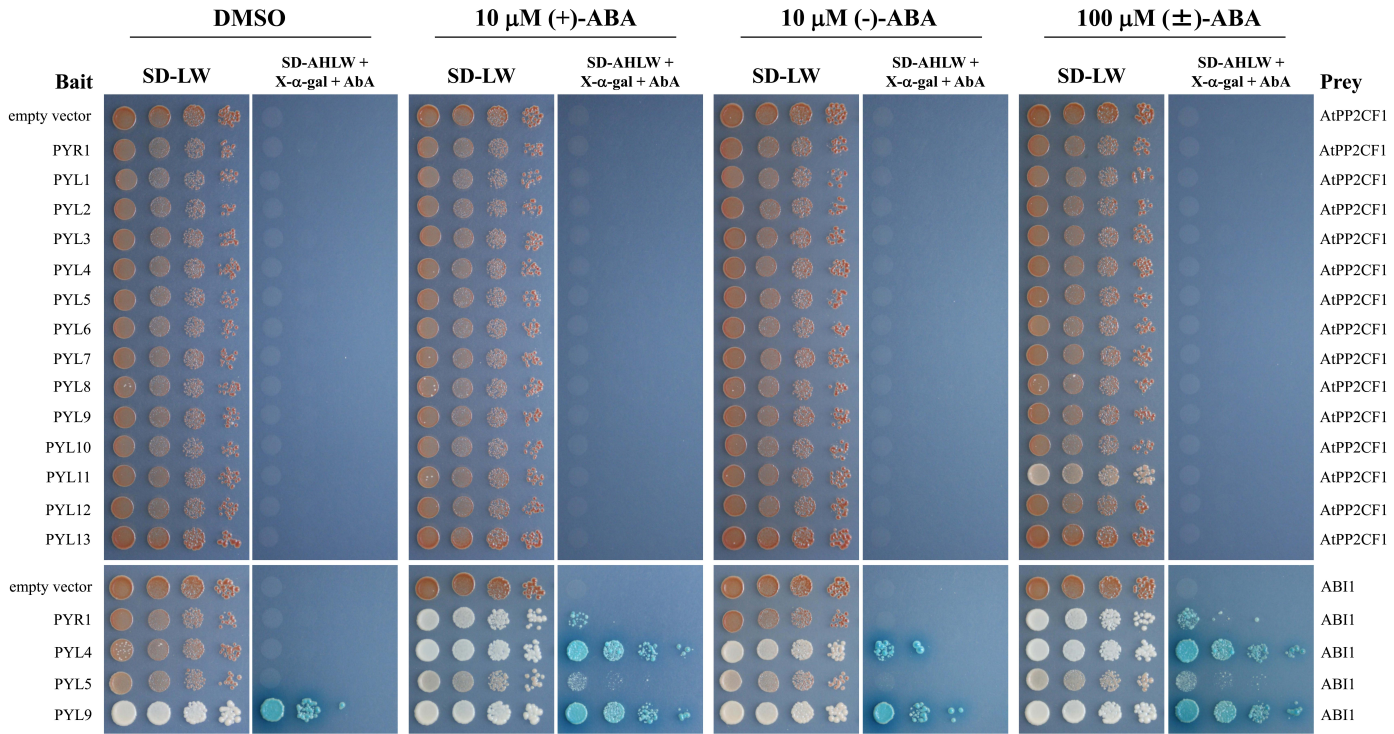

**B**

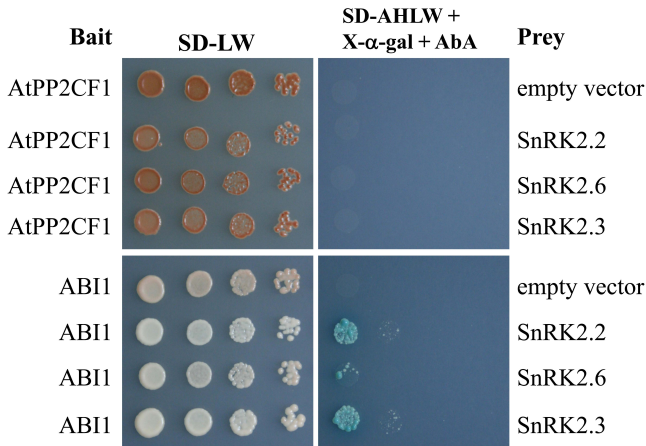

**Supplementary Figure S6.** AtPP2CF1 did not interact with PYR/PYL/RCAR receptors or with SnRK2 kinases in a Y2H assay. (A) Interaction assay using all PYR/PYL/RCAR receptor proteins as bait (fused to the Gal4 DNA-binding domain, DB) and either AtPP2CF1 or ABI1 as prey (fused to the Gal4 activation domain, AD). ABI1 was used as a positive control. Serial dilutions of exponentially growing yeast cell cultures were spotted on an SD plate lacking Leu and Trp (SD-LW) and an SD-AHLW plate containing aureobasidin A and X- $\alpha$ -gal (SD-AHLW+AbA+X- $\alpha$ -gal), supplemented with 0.01% DMSO (mock control), 10  $\mu$ M (+)-ABA, 10  $\mu$ M (-)-ABA or 100  $\mu$ M ( $\pm$ )-ABA and growth was observed after 5 d at 30° C. (B) Interaction assay using either AtPP2CF1 or ABI1 as bait (fused to DB) and three SnRK2 kinase proteins as prey (fused to AD). ABI1 was used as a positive control. Serial dilutions of exponentially growing yeast cell cultures were spotted on an SD-LW plate and an SD-AHLW+AbA+X- $\alpha$ -gal plate, and growth was observed after 5 d at 30° C.



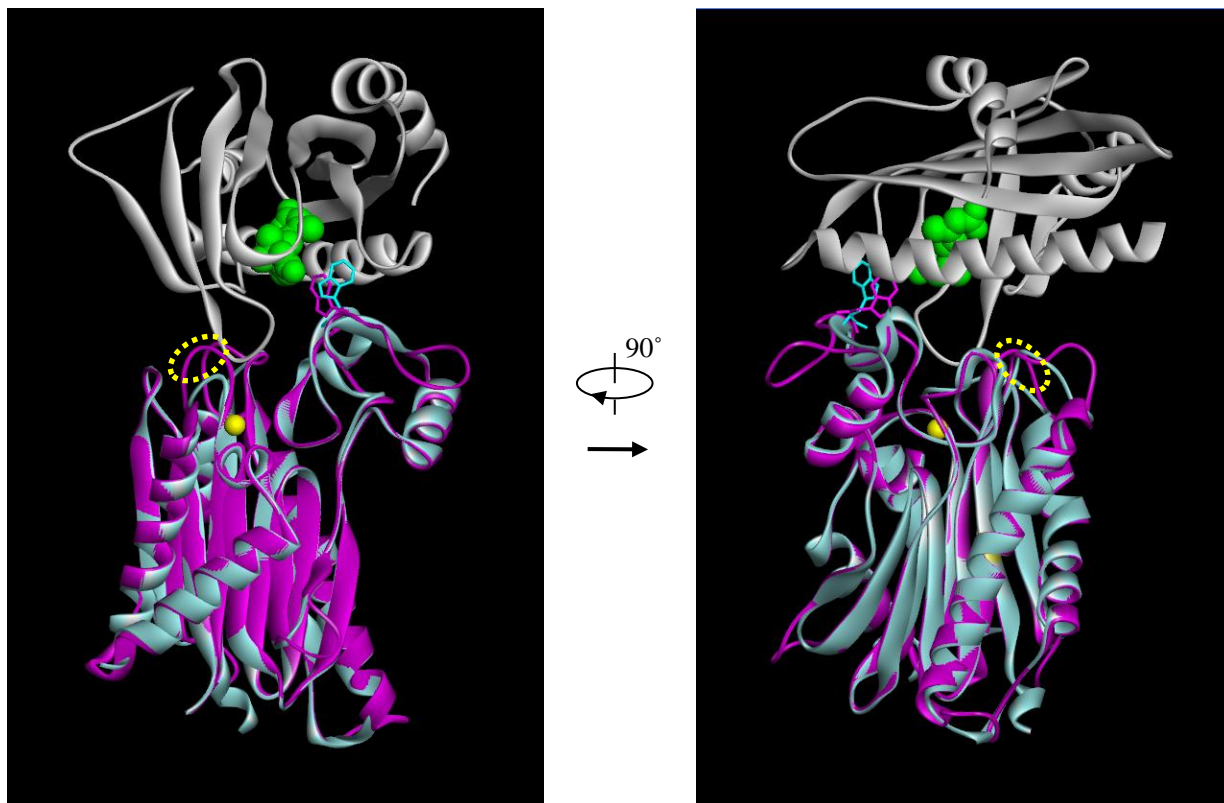

**Supplementary Figure S7.** Homology-based structural modelling of AtPP2CF1. A ribbon representation of AtPP2CF1 was generated. The hypothetical structure of AtPP2CF1 (magenta) was superimposed with the well-defined crystal structure of ABI1 (blue) in complex with PYL1 (gray) and (+)-ABA (green) (Protein Data Bank code 3kdj). (+)-ABA is shown as a green sphere. At least one metal ion in the putative active site of AtPP2CF1 is shown (yellow sphere). Trp246 of AtPP2CF1 and Trp300 of ABI1 are highlighted in the stick representation. The dotted yellow circle represents the  $\beta$ 3- $\alpha$ 1 loop of consensus motif 4 (Also see supplementary Fig. S2). Two perpendicular views are shown.

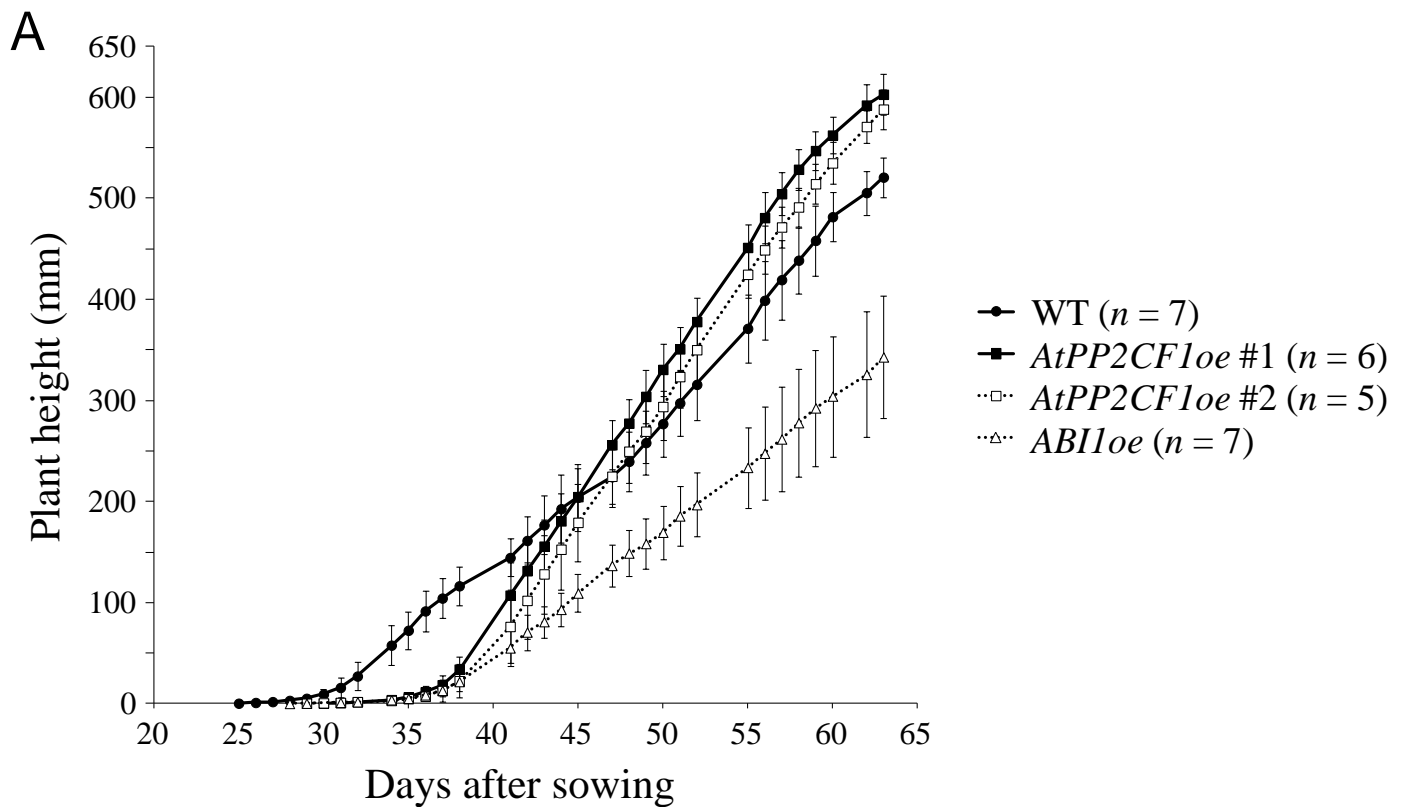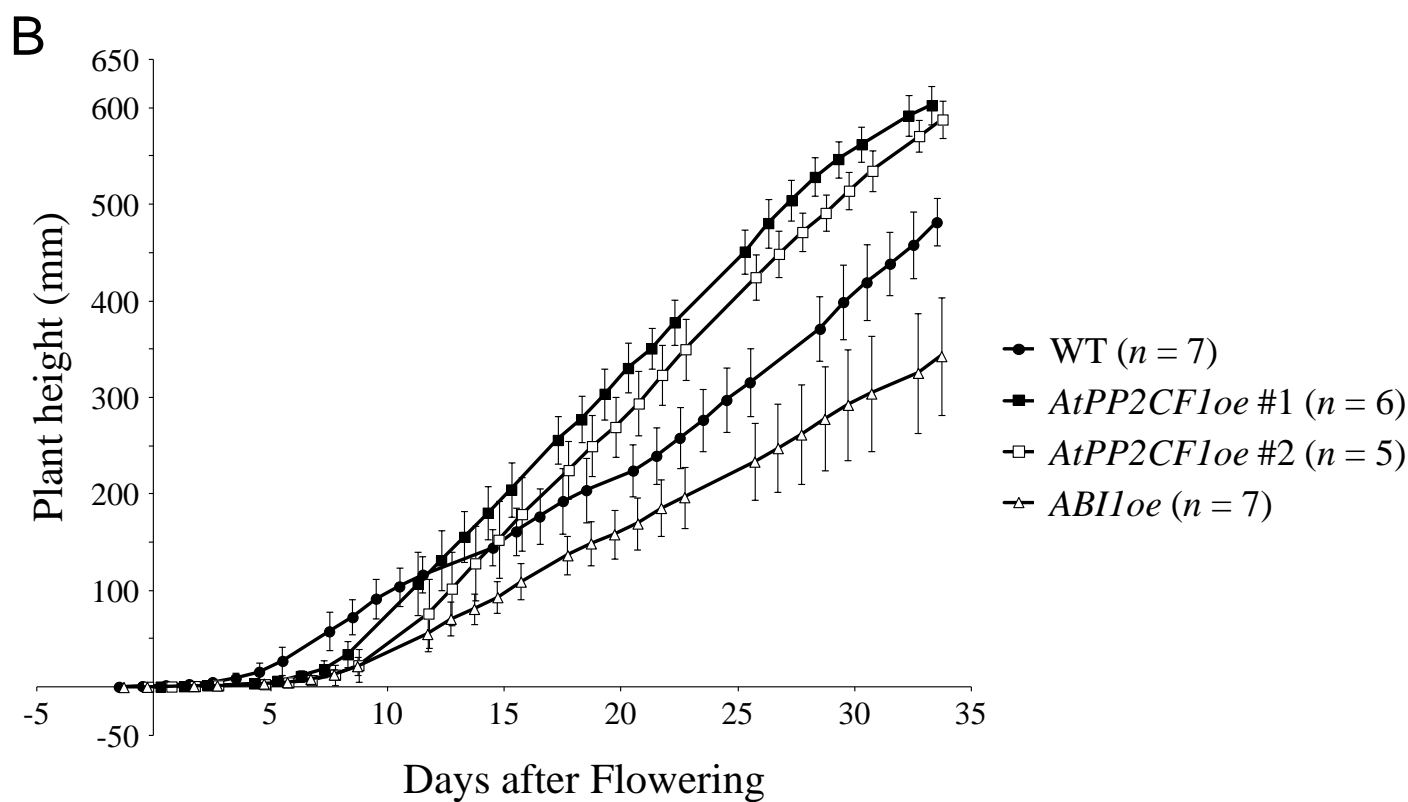

**Supplementary Figure S8.** Kinematic analysis of the height of wild-type (WT), *AtPP2CF1oe* (#1 and #2), and *ABI1oe* plants. (A) Comparison of plant height according to days after sowing. (B) Comparison of plant height according to days after flowering. This figure was modified from supplementary Fig. S8A. ‘Day 0’ was defined as the average flowering date after sowing (Also see Fig. 7A). Values represent the mean  $\pm$  S.D.

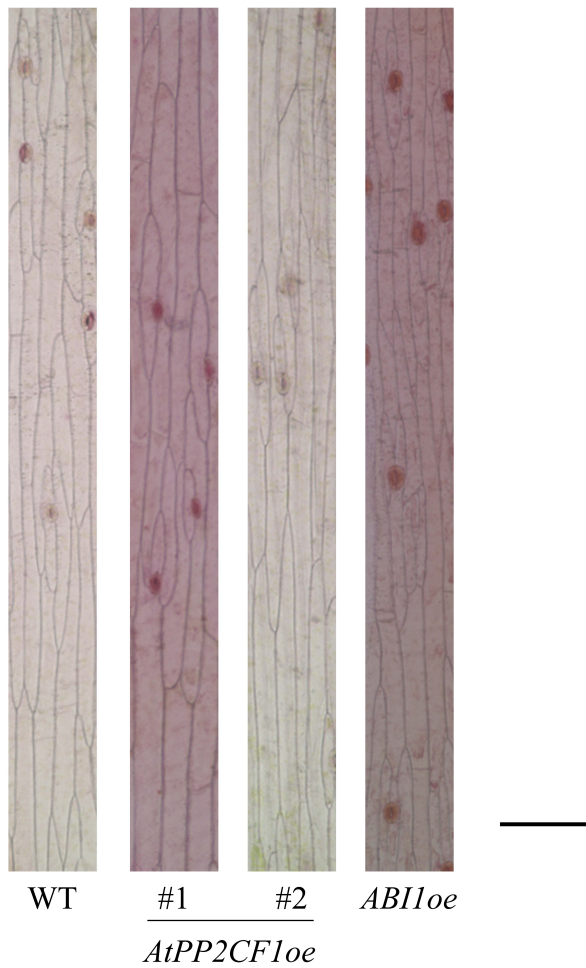

**Supplementary Figure S9.** Safranin-stained epidermises peeled from primary inflorescence stems of wild-type (WT), *AtPP2CF1oe* (#1 and #2) and *ABI1oe* plants. Basal parts (20 mm from the base) of primary inflorescence stems in 9-week-old plants were used for observations. Scale bar: 100  $\mu$ m.

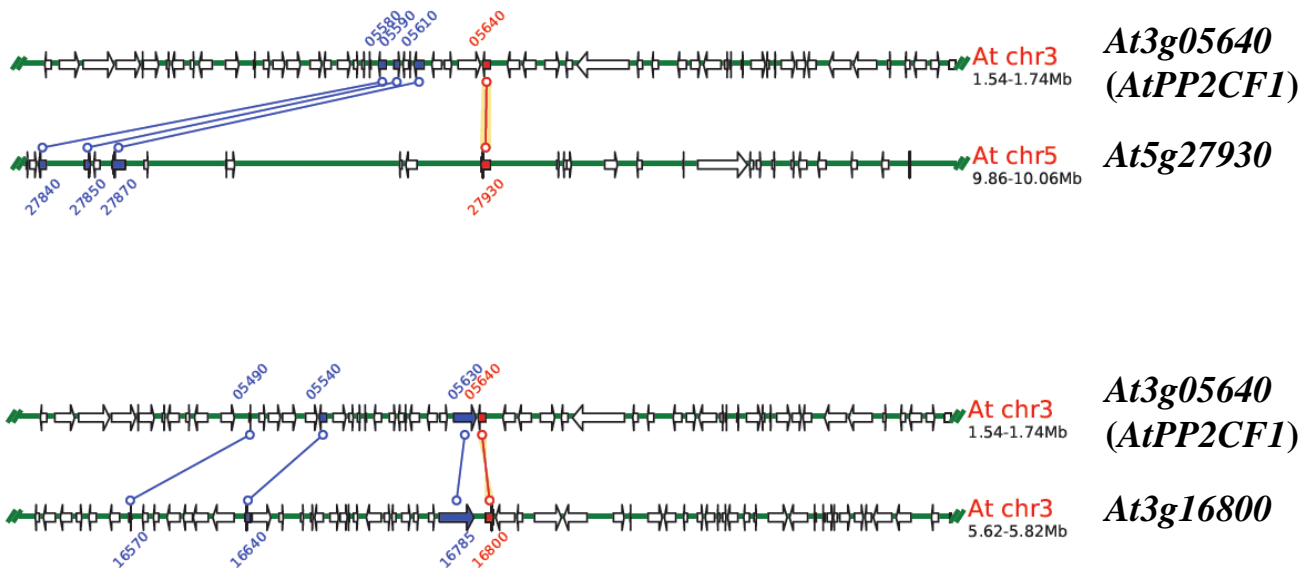

**Supplementary Figure S10.** Segmental chromosomal duplication regions of *AtPP2CF1*. Segmental chromosome duplications of *AtPP2CF1* in the *Arabidopsis* genome were identified by the PGDD (Plant Genome Duplication Database) (Lee *et al.*, 2012) with a threshold score of 200 or more. Segmental duplication maps display only  $\pm 100$  kb regions. Red arrows indicate the *AtPP2CF1*, *At5g27930*, and *At3g16800* loci. Blue arrows indicate the other paralogous gene pairs on each distinct chromosomal region.
